# Supplementary material for: Clifti-GPT: Privacy-preserving federated fine-tuning and transferable inference of foundation models on clinical single-cell data
Source: Research Square preprint supplement (doi:10.21203/rs.3.rs-7917089/v1), 2025-11-10
Supplement: Supplementary file 1 [file c53c2b029d9a4062a408438f.xlsx]

## Sheet: Table 1 MS
	Reference				Query
Column 1	Control Cerebral	Control Prefrontal	MS Cerebral	MS Prefrontal	Control Premotor	MS Premotor	Total
Astrocyte	14	122	224	870	18	236	1484
Endothelial	0	38	64	106	0	0	208
L2/3 excitatory A	891	686	193	113	433	8	2324
L2/3 excitatory B	20	900	872	1207	99	99	3197
L4 excitatory	116	980	633	831	188	40	2788
L5/6 excitatory	52	748	860	775	197	97	2729
Microglia	1	1	14	99	2	5	122
Mixed excitatory	4	104	73	110	6	2	299
Mixed glia	0	25	299	106	35	168	633
OPC	5	31	94	659	19	113	921
Oligodendrocyte A	0	7	158	745	46	313	1269
Oligodendrocyte C	0	3	11	23	0	0	37
PVALB interneuron	64	424	350	488	81	40	1447
Phagocyte	0	0	17	30	3	35	85
Pyramidal neuron	3	404	159	367	6	2	941
SST interneuron	4	163	114	129	5	15	430
SV2C interneuron	26	163	141	184	45	19	578
VIP interneuron	159	423	302	738	80	118	1820
Total	1359	5222	4578	7580	1263	1310	21312

## Sheet: Table 2 HP
	Reference				Query
Column 1	Baron	Muraro	Wang	Xin	Segerstolpe	Total
Acinar	925	219	28	0	181	1353
Alpha	2324	812	267	886	858	5147
Beta	2518	448	276	472	258	3972
Delta	600	193	32	49	107	981
Ductal	1045	245	32	0	382	1704
Endothelial	252	21	1	0	15	289
Epsilon	18	3	0	0	7	28
MHC class II	0	0	1	0	4	5
Mast	25	0	0	0	7	32
PP	255	101	7	85	190	638
PSC	444	80	20	0	53	597
Total	8406	2122	664	1492	2062	14746

## Sheet: Table 3 Lung-Kim
	Reference										Query
Column 1	P0006	P0008	P0018	P0020	P0025	P0028	P0030	P0034	P1028	P1058	P0019	P0031	P1006	P1049	Total
B_cell	179	641	42	12	470	226	45	14	1	50	171	179	16	131	2177
Dendritic	10	14	6	18	17	1	15	3	0	3	32	8	0	0	127
Endothelial	46	10	16	2	23	24	93	16	2	10	134	114	1	1	492
Epithelial	60	3	10	80	28	221	122	62	104	23	119	100	7	5	944
Fibroblast	447	180	171	15	19	58	62	22	6	75	101	425	2	0	1583
Macrophage	511	198	765	789	481	679	769	244	52	305	1000	308	185	201	6487
Malignant	74	26	901	345	106	867	514	2008	4213	336	168	104	806	70	10538
Mast	67	42	47	43	52	105	68	13	8	34	219	63	1	2	764
NK_cell	31	15	25	7	43	12	20	0	0	28	139	13	9	297	639
T_cell	913	1076	383	780	460	255	208	18	20	452	912	492	85	667	6721
Total	2338	2205	2366	2091	1699	2448	1916	2400	4406	1316	2995	1806	1112	1374	30472

## Sheet: Table 4 CL
	Reference		Query
Column 1	0	1	2	Total
293t	2885	0	1605	4490
jurkat	0	3258	1783	5041
Total	2885	3258	3388	9531

## Sheet: Table 5 myeloid-top5
	Reference					Query
Column 1	1	2	3	4	rest	5	6	7	8	11	12	13	14	18	19	24	26	27	28	30	31	33	34	35	36	37	38	39	40	41	55	56	57	58	59	61	62	63	64	65	66	68	69	70	71	72	73	74	75
Macro_C1QC	90	21	304	12	724	1	41	5	15	0	22	7	10	16	4	1	0	0	0	0	0	15	44	8	39	3	5	43	20	1	1	0	1	1	1	0	1	0	0	0	69	0	0	1	0	1	1	1	1
Macro_FN1	153	68	0	0	42	0	0	0	0	0	0	0	0	0	0	0	0	0	0	0	0	0	0	0	0	0	0	0	0	0	0	0	0	0	0	0	0	0	0	0	0	0	0	0	0	0	0	0	0
Macro_GPNMB	249	64	0	4	139	0	0	0	0	0	0	0	0	0	0	0	0	0	0	0	0	0	0	0	0	0	0	0	0	0	0	0	0	0	0	0	0	0	0	0	0	0	0	0	0	0	0	0	0
Macro_IL1B	183	141	0	16	116	0	0	0	0	0	0	0	0	0	0	0	0	0	0	0	0	0	0	0	0	0	0	0	0	0	0	0	0	0	0	0	0	0	0	0	0	0	0	0	0	0	0	0	0
Macro_INHBA	0	0	0	0	213	1	24	0	3	1	17	8	31	10	0	0	0	0	0	0	0	0	0	0	0	0	0	0	0	0	7	7	8	17	3	1	11	4	6	0	1	0	0	2	0	5	0	0	0
Macro_ISG15	0	0	0	0	84	0	0	0	0	0	0	0	0	30	0	0	0	0	0	0	0	0	0	0	0	0	0	0	0	0	0	4	3	11	1	1	4	0	12	0	2	1	0	0	0	0	0	1	1
Macro_LYVE1	10	1	0	64	425	11	0	8	3	24	16	34	9	0	0	0	0	0	0	0	0	0	0	0	0	0	0	0	0	0	1	1	3	4	3	3	7	9	7	0	1	1	0	1	0	2	2	0	40
Macro_NLRP3	0	0	0	0	516	63	3	9	5	15	5	2	2	6	0	0	0	0	0	0	0	0	0	0	0	0	0	0	0	0	3	10	3	15	13	4	20	14	15	0	0	2	2	4	0	1	3	5	26
Macro_SPP1	0	0	270	0	192	0	0	0	0	0	0	0	0	0	0	0	0	0	0	0	0	14	14	26	7	0	1	22	0	0	0	4	0	8	2	0	1	1	22	0	1	0	0	0	0	1	0	2	0
Mono_CD14	181	105	35	158	1523	11	13	8	15	8	4	2	1	12	43	61	0	0	0	0	0	7	10	16	4	6	22	10	0	0	1	2	3	7	1	0	2	2	1	0	0	0	0	1	0	1	5	3	1
Mono_CD16	102	216	20	262	1498	19	1	5	0	2	0	2	0	0	4	53	0	0	0	0	0	5	2	4	1	6	3	1	0	1	6	3	2	10	5	2	0	3	7	0	0	1	0	0	0	1	1	0	6
cDC1_CLEC9A	27	3	2	2	64	3	0	0	0	1	1	4	0	0	1	0	0	0	0	0	0	1	0	0	0	0	0	1	0	0	0	1	6	5	2	2	0	0	2	0	1	0	0	1	0	1	4	0	2
cDC2_CD1A	26	0	1	1	119	1	0	1	0	1	1	6	0	3	0	0	0	2	0	0	3	0	1	0	5	0	0	3	0	2	0	22	3	1	1	0	4	1	0	2	3	2	1	0	1	1	0	2	0
cDC2_CD1C	566	57	25	50	592	5	0	4	3	11	18	15	2	3	5	4	0	0	0	0	0	1	3	0	14	1	1	11	9	4	4	22	23	11	10	1	11	6	3	2	18	4	5	5	1	6	3	1	11
cDC2_CXCL9	16	2	0	0	7	0	0	0	0	0	0	1	0	0	1	0	0	3	0	0	0	0	0	0	0	0	0	0	0	0	0	0	2	0	0	0	0	0	0	0	4	0	0	0	0	0	0	0	0
cDC2_CXCR4hi	162	25	6	15	109	1	0	1	0	3	7	1	0	0	0	0	1	1	1	4	0	1	0	0	3	0	1	0	0	2	1	2	1	1	1	1	0	2	0	3	6	0	1	0	0	2	0	0	2
cDC2_FCN1	15	0	3	11	80	0	0	0	0	2	3	0	0	0	0	0	6	0	5	1	0	0	0	0	1	0	0	4	0	0	0	1	2	0	0	0	0	0	0	0	0	0	0	0	1	0	0	1	0
cDC2_IL1B	70	10	13	5	64	0	0	1	0	3	1	19	0	0	0	0	0	1	0	0	4	0	0	0	1	0	0	0	9	5	1	2	4	5	2	1	8	4	2	0	0	0	0	0	0	0	0	0	4
cDC2_ISG15	39	0	1	2	11	0	0	0	0	0	1	0	0	0	0	0	0	0	0	1	0	0	0	0	2	0	0	0	0	0	0	0	0	1	0	0	0	0	1	0	0	0	0	0	0	0	0	0	0
cDC3_LAMP3	22	2	1	1	68	0	8	1	3	0	1	1	1	1	0	0	0	0	0	0	0	1	0	0	1	0	0	7	0	0	0	1	3	4	1	0	1	1	3	1	0	0	1	1	8	1	0	0	1
pDC_LILRA4	0	0	2	5	52	1	0	0	0	1	1	2	1	0	8	1	0	0	0	0	0	0	0	0	0	0	0	0	0	0	0	2	7	1	6	1	0	0	1	2	0	2	7	3	19	3	1	1	0
Total	1911	715	683	608	6638	117	90	43	47	72	98	104	57	81	66	120	7	7	6	6	7	45	74	54	78	16	33	102	38	15	25	84	74	102	52	17	70	47	82	10	106	13	17	19	30	26	20	17	95
[truncated: 11 more columns]

## Sheet: Table 6 myeloid-top10
	Reference										Query
	1	2	3	4	5	6	7	8	9	rest	11	12	13	14	18	19	24	26	27	28	30	31	33	34	35	36	37	38	39	40	41	55	56	57	58	59	61	62	63	64	65	66	68	69	70	71	72	73	74
Macro_C1QC	90	21	304	12	22	48	7	107	0	602	0	22	7	10	16	4	1	0	0	0	0	0	15	44	8	39	3	5	43	20	1	1	0	1	1	1	0	1	0	0	0	69	0	0	1	0	1	1	1
Macro_FN1	153	68	0	0	8	0	0	3	3	28	0	0	0	0	0	0	0	0	0	0	0	0	0	0	0	0	0	0	0	0	0	0	0	0	0	0	0	0	0	0	0	0	0	0	0	0	0	0	0
Macro_GPNMB	249	64	0	4	2	0	0	15	1	121	0	0	0	0	0	0	0	0	0	0	0	0	0	0	0	0	0	0	0	0	0	0	0	0	0	0	0	0	0	0	0	0	0	0	0	0	0	0	0
Macro_IL1B	183	141	0	16	20	0	0	17	17	62	0	0	0	0	0	0	0	0	0	0	0	0	0	0	0	0	0	0	0	0	0	0	0	0	0	0	0	0	0	0	0	0	0	0	0	0	0	0	0
Macro_INHBA	0	0	0	0	1	24	0	3	0	213	1	17	8	31	10	0	0	0	0	0	0	0	0	0	0	0	0	0	0	0	0	7	7	8	17	3	1	11	4	6	0	1	0	0	2	0	5	0	0
Macro_ISG15	0	0	0	0	0	37	0	0	0	47	0	0	0	0	30	0	0	0	0	0	0	0	0	0	0	0	0	0	0	0	0	0	4	3	11	1	1	4	0	12	0	2	1	0	0	0	0	0	1
Macro_LYVE1	10	1	0	64	30	9	11	6	19	372	24	16	34	9	0	0	0	0	0	0	0	0	0	0	0	0	0	0	0	0	0	1	1	3	4	3	3	7	9	7	0	1	1	0	1	0	2	2	0
Macro_NLRP3	0	0	0	0	63	82	85	5	0	361	15	5	2	2	6	0	0	0	0	0	0	0	0	0	0	0	0	0	0	0	0	3	10	3	15	13	4	20	14	15	0	0	2	2	4	0	1	3	5
Macro_SPP1	0	0	270	0	0	86	3	0	0	103	0	0	0	0	0	0	0	0	0	0	0	0	14	14	26	7	0	1	22	0	0	0	4	0	8	2	0	1	1	22	0	1	0	0	0	0	1	0	2
Mono_CD14	181	105	35	158	152	105	173	91	109	940	8	4	2	1	12	43	61	0	0	0	0	0	7	10	16	4	6	22	10	0	0	1	2	3	7	1	0	2	2	1	0	0	0	0	1	0	1	5	3
Mono_CD16	102	216	20	262	203	8	31	174	200	907	2	0	2	0	0	4	53	0	0	0	0	0	5	2	4	1	6	3	1	0	1	6	3	2	10	5	2	0	3	7	0	0	1	0	0	0	1	1	0
cDC1_CLEC9A	27	3	2	2	10	7	7	0	0	43	1	1	4	0	0	1	0	0	0	0	0	0	1	0	0	0	0	0	1	0	0	0	1	6	5	2	2	0	0	2	0	1	0	0	1	0	1	4	0
cDC2_CD1A	26	0	1	1	2	14	13	0	0	92	1	1	6	0	3	0	0	0	2	0	0	3	0	1	0	5	0	0	3	0	2	0	22	3	1	1	0	4	1	0	2	3	2	1	0	1	1	0	2
cDC2_CD1C	566	57	25	50	85	44	64	13	21	377	11	18	15	2	3	5	4	0	0	0	0	0	1	3	0	14	1	1	11	9	4	4	22	23	11	10	1	11	6	3	2	18	4	5	5	1	6	3	1
cDC2_CXCL9	16	2	0	0	1	3	0	0	0	3	0	0	1	0	0	1	0	0	3	0	0	0	0	0	0	0	0	0	0	0	0	0	0	2	0	0	0	0	0	0	0	4	0	0	0	0	0	0	0
cDC2_CXCR4hi	162	25	6	15	13	14	29	0	3	52	3	7	1	0	0	0	0	1	1	1	4	0	1	0	0	3	0	1	0	0	2	1	2	1	1	1	1	0	2	0	3	6	0	1	0	0	2	0	0
cDC2_FCN1	15	0	3	11	6	20	25	0	3	26	2	3	0	0	0	0	0	6	0	5	1	0	0	0	0	1	0	0	4	0	0	0	1	2	0	0	0	0	0	0	0	0	0	0	0	1	0	0	1
cDC2_IL1B	70	10	13	5	20	0	2	1	1	41	3	1	19	0	0	0	0	0	1	0	0	4	0	0	0	1	0	0	0	9	5	1	2	4	5	2	1	8	4	2	0	0	0	0	0	0	0	0	0
cDC2_ISG15	39	0	1	2	4	1	0	1	0	5	0	1	0	0	0	0	0	0	0	0	1	0	0	0	0	2	0	0	0	0	0	0	0	0	1	0	0	0	0	1	0	0	0	0	0	0	0	0	0
cDC3_LAMP3	22	2	1	1	2	28	4	3	0	43	0	1	1	1	1	0	0	0	0	0	0	0	1	0	0	1	0	0	7	0	0	0	1	3	4	1	0	1	1	3	1	0	0	1	1	8	1	0	0
pDC_LILRA4	0	0	2	5	3	11	8	1	0	30	1	1	2	1	0	8	1	0	0	0	0	0	0	0	0	0	0	0	0	0	0	0	2	7	1	6	1	0	0	1	2	0	2	7	3	19	3	1	1
Total	1911	715	683	608	647	541	462	440	377	4468	72	98	104	57	81	66	120	7	7	6	6	7	45	74	54	78	16	33	102	38	15	25	84	74	102	52	17	70	47	82	10	106	13	17	19	30	26	20	17
[truncated: 12 more columns]

## Sheet: Table 7 myeloid-top20
	Reference																				Query
	1	2	3	4	5	6	7	8	9	10	11	12	13	14	15	16	17	18	19	rest	24	26	27	28	30	31	33	34	35	36	37	38	39	40	41	55	56	57	58	59	61	62	63	64	65	66	68	69	70
Macro_C1QC	90	21	304	12	22	48	7	107	0	64	3	120	12	14	1	9	5	18	13	402	1	0	0	0	0	0	15	44	8	39	3	5	43	20	1	1	0	1	1	1	0	1	0	0	0	69	0	0	1
Macro_FN1	153	68	0	0	8	0	0	3	3	5	2	0	0	0	0	1	0	15	0	5	0	0	0	0	0	0	0	0	0	0	0	0	0	0	0	0	0	0	0	0	0	0	0	0	0	0	0	0	0
Macro_GPNMB	249	64	0	4	2	0	0	15	1	109	0	0	0	0	0	0	0	1	0	11	0	0	0	0	0	0	0	0	0	0	0	0	0	0	0	0	0	0	0	0	0	0	0	0	0	0	0	0	0
Macro_IL1B	183	141	0	16	20	0	0	17	17	0	14	0	0	0	0	19	0	5	0	24	0	0	0	0	0	0	0	0	0	0	0	0	0	0	0	0	0	0	0	0	0	0	0	0	0	0	0	0	0
Macro_INHBA	0	0	0	0	1	24	0	3	0	0	1	17	12	31	0	0	4	10	0	205	0	0	0	0	0	0	0	0	0	0	0	0	0	0	0	7	7	8	17	3	1	11	4	6	0	1	0	0	2
Macro_ISG15	0	0	0	0	0	37	0	0	0	0	0	9	0	0	0	0	0	30	0	38	0	0	0	0	0	0	0	0	0	0	0	0	0	0	0	0	4	3	11	1	1	4	0	12	0	2	1	0	0
Macro_LYVE1	10	1	0	64	30	9	11	6	19	1	42	30	136	9	0	132	13	0	0	92	0	0	0	0	0	0	0	0	0	0	0	0	0	0	0	1	1	3	4	3	3	7	9	7	0	1	1	0	1
Macro_NLRP3	0	0	0	0	63	82	85	5	0	0	15	15	75	2	0	0	77	6	0	201	0	0	0	0	0	0	0	0	0	0	0	0	0	0	0	3	10	3	15	13	4	20	14	15	0	0	2	2	4
Macro_SPP1	0	0	270	0	0	86	3	0	0	0	0	32	0	0	0	0	0	0	0	71	0	0	0	0	0	0	14	14	26	7	0	1	22	0	0	0	4	0	8	2	0	1	1	22	0	1	0	0	0
Mono_CD14	181	105	35	158	152	105	173	91	109	44	107	59	41	222	46	20	65	99	114	193	61	0	0	0	0	0	7	10	16	4	6	22	10	0	0	1	2	3	7	1	0	2	2	1	0	0	0	0	1
Mono_CD16	102	216	20	262	203	8	31	174	200	13	155	5	37	35	215	45	31	77	119	183	53	0	0	0	0	0	5	2	4	1	6	3	1	0	1	6	3	2	10	5	2	0	3	7	0	0	1	0	0
cDC1_CLEC9A	27	3	2	2	10	7	7	0	0	6	2	8	8	0	0	0	0	1	1	24	0	0	0	0	0	0	1	0	0	0	0	0	1	0	0	0	1	6	5	2	2	0	0	2	0	1	0	0	1
cDC2_CD1A	26	0	1	1	2	14	13	0	0	46	2	17	7	0	0	0	3	4	0	24	0	0	2	0	0	3	0	1	0	5	0	0	3	0	2	0	22	3	1	1	0	4	1	0	2	3	2	1	0
cDC2_CD1C	566	57	25	50	85	44	64	13	21	49	31	45	26	12	9	19	10	13	6	211	4	0	0	0	0	0	1	3	0	14	1	1	11	9	4	4	22	23	11	10	1	11	6	3	2	18	4	5	5
cDC2_CXCL9	16	2	0	0	1	3	0	0	0	0	1	0	1	0	0	0	0	1	1	1	0	0	3	0	0	0	0	0	0	0	0	0	0	0	0	0	0	2	0	0	0	0	0	0	0	4	0	0	0
cDC2_CXCR4hi	162	25	6	15	13	14	29	0	3	0	7	9	7	0	0	3	3	3	0	31	0	1	1	1	4	0	1	0	0	3	0	1	0	0	2	1	2	1	1	1	1	0	2	0	3	6	0	1	0
cDC2_FCN1	15	0	3	11	6	20	25	0	3	0	3	3	3	0	0	0	1	0	0	21	0	6	0	5	1	0	0	0	0	1	0	0	4	0	0	0	1	2	0	0	0	0	0	0	0	0	0	0	0
cDC2_IL1B	70	10	13	5	20	0	2	1	1	0	5	1	20	0	0	3	2	1	0	32	0	0	1	0	0	4	0	0	0	1	0	0	0	9	5	1	2	4	5	2	1	8	4	2	0	0	0	0	0
cDC2_ISG15	39	0	1	2	4	1	0	1	0	1	1	1	0	0	0	1	0	0	0	2	0	0	0	0	1	0	0	0	0	2	0	0	0	0	0	0	0	0	1	0	0	0	0	1	0	0	0	0	0
cDC3_LAMP3	22	2	1	1	2	28	4	3	0	14	0	10	2	2	0	2	0	2	0	15	0	0	0	0	0	0	1	0	0	1	0	0	7	0	0	0	1	3	4	1	0	1	1	3	1	0	0	1	1
pDC_LILRA4	0	0	2	5	3	11	8	1	0	0	1	6	2	4	3	0	4	0	11	12	1	0	0	0	0	0	0	0	0	0	0	0	0	0	0	0	2	7	1	6	1	0	0	1	2	0	2	7	3
Total	1911	715	683	608	647	541	462	440	377	352	392	387	389	331	274	254	218	286	265	1798	120	7	7	6	6	7	45	74	54	78	16	33	102	38	15	25	84	74	102	52	17	70	47	82	10	106	13	17	19
[truncated: 16 more columns]

## Sheet: Table 8 myeloid-top30
	Reference																														Query
	1	2	3	4	5	6	7	8	9	10	11	12	13	14	15	16	17	18	19	20	21	22	23	24	25	26	27	28	29	30	31	33	34	35	36	37	38	39	40	41	55	56	57	58	59	61	62	63	64
Macro_C1QC	90	21	304	12	22	48	7	107	0	64	3	120	12	14	1	9	5	18	13	85	2	2	3	10	2	3	58	97	89	52	0	15	44	8	39	3	5	43	20	1	1	0	1	1	1	0	1	0	0
Macro_FN1	153	68	0	0	8	0	0	3	3	5	2	0	0	0	0	1	0	15	0	0	0	0	0	0	4	1	0	0	0	0	0	0	0	0	0	0	0	0	0	0	0	0	0	0	0	0	0	0	0
Macro_GPNMB	249	64	0	4	2	0	0	15	1	109	0	0	0	0	0	0	0	1	0	0	0	0	0	0	11	0	0	0	0	0	0	0	0	0	0	0	0	0	0	0	0	0	0	0	0	0	0	0	0
Macro_IL1B	183	141	0	16	20	0	0	17	17	0	14	0	0	0	0	19	0	5	0	0	0	0	0	0	16	8	0	0	0	0	0	0	0	0	0	0	0	0	0	0	0	0	0	0	0	0	0	0	0
Macro_INHBA	0	0	0	0	1	24	0	3	0	0	1	17	12	31	0	0	4	10	0	0	125	2	0	0	0	0	39	0	0	39	0	0	0	0	0	0	0	0	0	0	7	7	8	17	3	1	11	4	6
Macro_ISG15	0	0	0	0	0	37	0	0	0	0	0	9	0	0	0	0	0	30	0	0	2	0	6	3	0	0	27	0	0	0	0	0	0	0	0	0	0	0	0	0	0	4	3	11	1	1	4	0	12
Macro_LYVE1	10	1	0	64	30	9	11	6	19	1	42	30	136	9	0	132	13	0	0	0	9	5	36	36	0	6	0	0	0	0	0	0	0	0	0	0	0	0	0	0	1	1	3	4	3	3	7	9	7
Macro_NLRP3	0	0	0	0	63	82	85	5	0	0	15	15	75	2	0	0	77	6	0	0	8	68	47	31	0	0	3	11	25	8	0	0	0	0	0	0	0	0	0	0	3	10	3	15	13	4	20	14	15
Macro_SPP1	0	0	270	0	0	86	3	0	0	0	0	32	0	0	0	0	0	0	0	24	0	47	0	0	0	0	0	0	0	0	0	14	14	26	7	0	1	22	0	0	0	4	0	8	2	0	1	1	22
Mono_CD14	181	105	35	158	152	105	173	91	109	44	107	59	41	222	46	20	65	99	114	18	0	21	26	75	42	44	2	4	3	19	0	7	10	16	4	6	22	10	0	0	1	2	3	7	1	0	2	2	1
Mono_CD16	102	216	20	262	203	8	31	174	200	13	155	5	37	35	215	45	31	77	119	4	10	2	12	68	58	70	5	5	0	2	0	5	2	4	1	6	3	1	0	1	6	3	2	10	5	2	0	3	7
cDC1_CLEC9A	27	3	2	2	10	7	7	0	0	6	2	8	8	0	0	0	0	1	1	2	0	2	4	6	1	0	2	2	5	0	0	1	0	0	0	0	0	1	0	0	0	1	6	5	2	2	0	0	2
cDC2_CD1A	26	0	1	1	2	14	13	0	0	46	2	17	7	0	0	0	3	4	0	7	0	3	1	10	0	0	2	3	0	0	3	0	1	0	5	0	0	3	0	2	0	22	3	1	1	0	4	1	0
cDC2_CD1C	566	57	25	50	85	44	64	13	21	49	31	45	26	12	9	19	10	13	6	42	21	20	35	37	10	13	4	14	14	5	0	1	3	0	14	1	1	11	9	4	4	22	23	11	10	1	11	6	3
cDC2_CXCL9	16	2	0	0	1	3	0	0	0	0	1	0	1	0	0	0	0	1	1	0	0	0	0	0	0	0	3	0	1	0	0	0	0	0	0	0	0	0	0	0	0	0	2	0	0	0	0	0	0
cDC2_CXCR4hi	162	25	6	15	13	14	29	0	3	0	7	9	7	0	0	3	3	3	0	4	2	2	6	5	4	6	1	3	0	5	0	1	0	0	3	0	1	0	0	2	1	2	1	1	1	1	0	2	0
cDC2_FCN1	15	0	3	11	6	20	25	0	3	0	3	3	3	0	0	0	1	0	0	8	1	2	2	4	0	6	0	9	0	1	0	0	0	0	1	0	0	4	0	0	0	1	2	0	0	0	0	0	0
cDC2_IL1B	70	10	13	5	20	0	2	1	1	0	5	1	20	0	0	3	2	1	0	3	13	3	6	0	3	1	1	0	0	3	4	0	0	0	1	0	0	0	9	5	1	2	4	5	2	1	8	4	2
cDC2_ISG15	39	0	1	2	4	1	0	1	0	1	1	1	0	0	0	1	0	0	0	0	0	1	0	0	1	0	0	0	0	1	0	0	0	0	2	0	0	0	0	0	0	0	0	1	0	0	0	0	1
cDC3_LAMP3	22	2	1	1	2	28	4	3	0	14	0	10	2	2	0	2	0	2	0	2	1	0	1	1	0	0	4	1	0	5	0	1	0	0	1	0	0	7	0	0	0	1	3	4	1	0	1	1	3
pDC_LILRA4	0	0	2	5	3	11	8	1	0	0	1	6	2	4	3	0	4	0	11	0	1	9	0	1	0	0	1	0	0	1	0	0	0	0	0	0	0	0	0	0	0	2	7	1	6	1	0	0	1
Total	1911	715	683	608	647	541	462	440	377	352	392	387	389	331	274	254	218	286	265	199	195	189	185	287	152	158	152	149	137	141	7	45	74	54	78	16	33	102	38	15	25	84	74	102	52	17	70	47	82
[truncated: 21 more columns]

## Sheet: Table 9 COVID-19
	Reference						Query
Column 1	10X	COVID	HCL	Northwestern	Oetjen	Sanger	Freytag	Krasnow	Sun	Total
AT1	0	0	0	107	0	70	0	61	0	238
AT2	0	0	0	1352	0	343	0	277	0	1972
B cell	0	11	441	0	0	0	0	0	0	452
CCR7+ T	0	155	0	0	0	0	0	0	0	155
CD10+ B cells	0	0	0	0	15	0	0	0	0	15
CD14+ Monocytes	240	0	0	0	60	0	26	0	118	444
CD16+ Monocytes	16	0	0	0	10	0	2	0	16	44
CD20+ B cells	95	0	0	0	44	0	36	0	27	202
CD4+ T cells	229	0	0	0	195	527	101	202	299	1553
CD8 T	0	200	0	0	0	0	0	0	0	200
CD8+ T cells	27	0	0	0	82	409	31	150	36	735
Ciliated	0	72	0	0	0	0	0	0	0	72
DC_activated	0	0	0	0	0	8	0	0	0	8
Dendritic cell	0	0	534	28	0	120	0	38	0	720
Erythrocytes	0	0	0	0	120	0	0	0	0	120
Erythroid progenitors	0	0	0	0	38	0	0	0	0	38
HSPCs	4	0	0	0	24	0	0	0	0	28
M2 Macrophage	0	0	398	0	0	0	0	0	0	398
Macrophages	0	3492	1778	972	0	357	0	1071	0	7670
Mast cells	0	5	98	6	0	196	0	143	0	448
Megakaryocyte progenitors	0	0	0	0	10	0	3	0	1	14
Monocyte progenitors	0	0	0	0	30	0	0	0	0	30
Monocytes	0	0	918	99	0	445	0	71	0	1533
NK	45	88	0	0	7	0	36	0	78	254
NKT cells	81	0	0	0	50	0	26	22	42	221
Neutrophil	0	119	667	0	0	0	0	0	0	786
Plasma	0	85	0	0	5	0	0	0	0	90
Proliferating Macrophage	0	0	0	18	0	0	0	15	0	33
Proliferating T	0	79	0	0	0	0	0	0	0	79
Secretory	0	88	0	27	0	0	0	0	0	115
T cell	0	12	1024	0	0	0	0	0	0	1036
Treg	0	30	0	0	0	0	0	0	0	30
Tregs	0	0	0	0	0	38	0	0	0	38
innate T	0	12	0	0	0	0	0	0	0	12
mDC	11	73	0	0	13	0	0	0	4	101
pDC	7	9	0	0	8	1	1	8	4	38
Total	755	4530	5858	2609	711	2514	262	2058	625	19922
Column 1	10X	COVID	HCL	Northwestern	Oetjen	Sanger	Freytag	Krasnow	Sun	Total
CD16+ Monocytes	16	0	0	0	10	0	2	0	16	44
Megakaryocyte progenitors	0	0	0	0	10	0	3	0	1	14
Proliferating Macrophage	0	0	0	18	0	0	0	15	0	33
pDC	7	9	0	0	8	1	1	8	4	38
Total	755	4530	5858	2609	711	2514	262	2058	625	19922
